# Supplementary material for: Small Open Reading Frames, Non-Coding RNAs and Repetitive Elements in Bradyrhizobium japonicum USDA 110
Source: PLoS One. 2016 Oct 27;11(10):e0165429. doi: 10.1371/journal.pone.0165429 (PMC5082802; doi:10.1371/journal.pone.0165429)
Supplement: S6 Table — (XLSX) [file pone.0165429.s023.xlsx]

## Sheet: Лист1
S6 Table. TLASTX analysis of the distribution of putative orthologs of 1080 B. japonicum USDA 110 sORFs among bacteria.
Locus Tag	Start	End	Direction	TBLASTX Taxonomy
blr0011_ISGA	14384	14506	+	Bradyrhizobium japonicum
bll0012_ISGA	16728	16856	-	Bradyrhizobium japonicum
blr0014_ISGA	31437	31676	+	Bradyrhizobium japonicum
blr0019_ISGA	51569	51688	+	Alphaproteobacteria
blr0020_ISGA	51769	51912	+	Bradyrhizobium japonicum
blr0045_ISGA	258422	258625	+	Alphaproteobacteria
blr0051_ISGA	335521	335661	+	Alphaproteobacteria
blr0080_ISGA	566192	566305	+	Bradyrhizobium japonicum
bll0083_ISGA	591230	591397	-	Alphaproteobacteria
blr0102_ISGA	839386	839565	+	Alphaproteobacteria
blr0105_ISGA	872861	873019	+	Bradyrhizobium
bll0106_ISGA	882064	882219	-	Bradyrhizobium
blr0112_ISGA	908398	908514	+	Bradyrhizobium
bll0135_ISGA	1079865	1080002	-	Alphaproteobacteria
bll0137_ISGA	1119853	1120041	-	Alphaproteobacteria
blr0152_ISGA	1246443	1246562	+	Bradyrhizobium japonicum
bll0176_ISGA	1441289	1441429	-	Bradyrhizobium
blr0186_ISGA	1528036	1528173	+	Alphaproteobacteria
bll0189_ISGA	1538664	1538792	-	Bradyrhizobium japonicum
blr0195_ISGA	1578938	1579108	+	Bradyrhizobium
blr0215_ISGA	1735513	1735650	+	Other
bll0220_ISGA	1764081	1764209	-	Other
blr0230_ISGA	1797198	1797356	+	Bradyrhizobium japonicum
blr0234_ISGA	1803227	1803346	+	Bradyrhizobium japonicum
blr0249_ISGA	1840239	1840424	+	Other
blr0250_ISGA	1844230	1844427	+	Other
blr0255_ISGA	1863107	1863280	+	Other
bll0279_ISGA	1984525	1984644	-	Bradyrhizobium japonicum
blr0281_ISGA	1987490	1987654	+	Other
bll0298_ISGA	2035903	2036118	-	Bradyrhizobium japonicum
blr0305_ISGA	2059141	2059317	+	Alphaproteobacteria
bll0309_ISGA	2061940	2062128	-	Bradyrhizobium japonicum
bll0310_ISGA	2063683	2063877	-	Other
bll0312_ISGA	2074357	2074470	-	Alphaproteobacteria
blr0329_ISGA	2131232	2131387	+	Other
blr0336_ISGA	2160212	2160367	+	Alphaproteobacteria
bll0343_ISGA	2193574	2193798	-	Alphaproteobacteria
bll0348_ISGA	2216238	2216354	-	Bradyrhizobium japonicum
blr0381_ISGA	2383502	2383618	+	Bradyrhizobium
bll0397_ISGA	2472160	2472288	-	Alphaproteobacteria
blr0423_ISGA	2650060	2650251	+	Alphaproteobacteria
blr0429_ISGA	2677987	2678196	+	Alphaproteobacteria
bll0438_ISGA	2754876	2755004	-	Alphaproteobacteria
blr0439_ISGA	2765894	2766007	+	Bradyrhizobium
blr0468_ISGA	2904870	2905007	+	Bradyrhizobium
bll0496_ISGA	3137796	3137933	-	Other
bll0501_ISGA	3236957	3237088	-	Bradyrhizobium
bll0502_ISGA	3280877	3281005	-	Bradyrhizobium japonicum
blr0508_ISGA	3311734	3311967	+	Alphaproteobacteria
blr0522_ISGA	3445455	3445610	+	Alphaproteobacteria
blr0532_ISGA	3511463	3511675	+	Alphaproteobacteria
bll0552_ISGA	3845544	3845669	-	Alphaproteobacteria
bll0564_ISGA	4062950	4063075	-	Bradyrhizobium japonicum
blr0581_ISGA	4201947	4202060	+	Alphaproteobacteria
bll0584_ISGA	4225280	4225519	-	Bradyrhizobium
blr0591_ISGA	4232468	4232581	+	Bradyrhizobium
blr0595_ISGA	4280525	4280746	+	Alphaproteobacteria
blr0601_ISGA	4293122	4293277	+	Bradyrhizobium japonicum
blr0606_ISGA	4332929	4333168	+	Alphaproteobacteria
blr0608_ISGA	4356829	4356966	+	Bradyrhizobium japonicum
blr0610_ISGA	4394167	4394280	+	Bradyrhizobium
blr0641_ISGA	4593766	4593999	+	Alphaproteobacteria
bll0667_ISGA	4673501	4673674	-	Other
bll0704_ISGA	4904977	4905105	-	Alphaproteobacteria
bll0720_ISGA	5010939	5011133	-	Bradyrhizobium
blr0768_ISGA	5185998	5186216	+	Alphaproteobacteria
blr0782_ISGA	5275619	5275741	+	Bradyrhizobium
blr0803_ISGA	5378723	5378908	+	Alphaproteobacteria
blr0811_ISGA	5458668	5458871	+	Bradyrhizobium
blr0834_ISGA	5599142	5599333	+	Bradyrhizobium
bll0840_ISGA	5642759	5642911	-	Bradyrhizobium japonicum
bll0841_ISGA	5646659	5646871	-	Bradyrhizobium japonicum
bll0842_ISGA	5650304	5650519	-	Other
blr0852_ISGA	5710095	5710217	+	Alphaproteobacteria
bll0889_ISGA	5941487	5941609	-	Bradyrhizobium
blr0916_ISGA	6080811	6080954	+	Bradyrhizobium
blr0924_ISGA	6139284	6139448	+	Alphaproteobacteria
blr0942_ISGA	6320432	6320551	+	Bradyrhizobium
bll0963_ISGA	6529077	6529232	-	Alphaproteobacteria
bll0964_ISGA	6555074	6555259	-	Alphaproteobacteria
bll0973_ISGA	6685679	6685849	-	Other
blr0975_ISGA	6714864	6715046	+	Bradyrhizobium
bll0982_ISGA	6729314	6729505	-	Alphaproteobacteria
bll0990_ISGA	6753435	6753617	-	Alphaproteobacteria
bll1017_ISGA	6991649	6991780	-	Alphaproteobacteria
bll1023_ISGA	7085464	7085583	-	Bradyrhizobium japonicum
bll1032_ISGA	7120064	7120180	-	Bradyrhizobium
blr1037_ISGA	7161770	7161898	+	Bradyrhizobium
blr1053_ISGA	7273810	7273962	+	Alphaproteobacteria
bll1067_ISGA	7411682	7411822	-	Bradyrhizobium
bll1102_ISGA	7716431	7716586	-	Alphaproteobacteria
blr1117_ISGA	7757478	7757594	+	Bradyrhizobium japonicum
blr1121_ISGA	7793742	7793867	+	Alphaproteobacteria
bll1160_ISGA	8098637	8098816	-	Alphaproteobacteria
bll1165_ISGA	8113887	8114024	-	Bradyrhizobium
bll1180_ISGA	8176664	8176810	-	Alphaproteobacteria
bll1183_ISGA	8195773	8195904	-	Bradyrhizobium
bll1204_ISGA	8351151	8351357	-	Alphaproteobacteria
blr1208_ISGA	8384414	8384527	+	Bradyrhizobium japonicum
bll1209_ISGA	8385954	8386100	-	Alphaproteobacteria
blr1245_ISGA	8457882	8458004	+	Bradyrhizobium japonicum
blr1264_ISGA	8573183	8573326	+	Bradyrhizobium
bll1269_ISGA	8681214	8681411	-	Alphaproteobacteria
bll1280_ISGA	8794516	8794689	-	Alphaproteobacteria
bll1313_ISGA	8996228	8996389	-	Alphaproteobacteria
blr1314_ISGA	8997197	8997319	+	Alphaproteobacteria
bll1320_ISGA	9013913	9014032	-	Bradyrhizobium japonicum
blr1329_ISGA	9044750	9044875	+	Alphaproteobacteria
blr1341_ISGA	9079070	9079186	+	Bradyrhizobium japonicum
bll0024_ISGA	87526	87717	-	Bradyrhizobium japonicum
blr0025_ISGA	96991	97143	+	Bradyrhizobium japonicum
blr0026_ISGA	97143	97256	+	Bradyrhizobium
blr0027_ISGA	103191	103406	+	Bradyrhizobium
blr0028_ISGA	103414	103551	+	Bradyrhizobium japonicum
bll0030_ISGA	122190	122306	-	Bradyrhizobium japonicum
bll0032_ISGA	128999	129211	-	Bradyrhizobium
bll0033_ISGA	137870	138019	-	Bradyrhizobium japonicum
blr0034_ISGA	141023	141142	+	Bradyrhizobium japonicum
blr0037_ISGA	164584	164706	+	Bradyrhizobium
blr0039_ISGA	175834	176061	+	Bradyrhizobium
blr0040_ISGA	194555	194752	+	Bradyrhizobium
bll0044_ISGA	253217	253363	-	Bradyrhizobium
bll0046_ISGA	258709	258864	-	Bradyrhizobium
bll0047_ISGA	292903	293124	-	Bradyrhizobium japonicum
blr0050_ISGA	315284	315415	+	Bradyrhizobium japonicum
bll0053_ISGA	377116	377301	-	Bradyrhizobium japonicum
bll0056_ISGA	392575	392697	-	Bradyrhizobium
blr0057_ISGA	393010	393147	+	Bradyrhizobium
bll0058_ISGA	393229	393360	-	Bradyrhizobium japonicum
blr0059_ISGA	394465	394644	+	Bradyrhizobium
bll0063_ISGA	432005	432163	-	Bradyrhizobium
bll0064_ISGA	432762	432980	-	Bradyrhizobium
blr0068_ISGA	462700	462816	+	Bradyrhizobium
blr0070_ISGA	501434	501565	+	Bradyrhizobium
blr0072_ISGA	527546	527674	+	Alphaproteobacteria
blr0076_ISGA	557531	557710	+	Bradyrhizobium
bll0084_ISGA	607894	608055	-	Bradyrhizobium japonicum
blr0085_ISGA	637281	637403	+	Bradyrhizobium japonicum
blr0086_ISGA	640016	640219	+	Alphaproteobacteria
blr0091_ISGA	705596	705724	+	Bradyrhizobium japonicum
bll0092_ISGA	728374	728529	-	Bradyrhizobium
blr0096_ISGA	764342	764479	+	Bradyrhizobium
bll0098_ISGA	785809	785991	-	Bradyrhizobium japonicum
bll0101_ISGA	837373	837492	-	Bradyrhizobium
blr0103_ISGA	860550	860699	+	Bradyrhizobium
blr0104_ISGA	871767	871901	+	Bradyrhizobium
bll0109_ISGA	896815	897021	-	Bradyrhizobium japonicum
blr0111_ISGA	902186	902299	+	Bradyrhizobium
blr0113_ISGA	908920	909060	+	Bradyrhizobium
bll0127_ISGA	988564	988779	-	Bradyrhizobium
blr0128_ISGA	995656	995808	+	Bradyrhizobium japonicum
blr0129_ISGA	997087	997209	+	Bradyrhizobium japonicum
bll0132_ISGA	1037354	1037518	-	Bradyrhizobium
bll0136_ISGA	1097645	1097764	-	Bradyrhizobium
blr0138_ISGA	1122957	1123070	+	Bradyrhizobium
blr0141_ISGA	1164323	1164481	+	Bradyrhizobium
blr0143_ISGA	1176730	1176939	+	Bradyrhizobium
bll0148_ISGA	1201827	1201940	-	Bradyrhizobium
blr0151_ISGA	1244499	1244624	+	Bradyrhizobium
bll0154_ISGA	1280618	1280812	-	Bradyrhizobium
blr0155_ISGA	1308823	1309062	+	Bradyrhizobium
blr0156_ISGA	1312605	1312772	+	Bradyrhizobium japonicum
bll0158_ISGA	1326979	1327152	-	Bradyrhizobium
bll0161_ISGA	1348120	1348269	-	Bradyrhizobium
blr0164_ISGA	1363482	1363682	+	Bradyrhizobium
bll0173_ISGA	1422268	1422429	-	Bradyrhizobium japonicum
bll0180_ISGA	1458910	1459074	-	Bradyrhizobium japonicum
bll0181_ISGA	1463210	1463416	-	Alphaproteobacteria
blr0182_ISGA	1465657	1465809	+	Bradyrhizobium japonicum
blr0184_ISGA	1496112	1496306	+	Bradyrhizobium
bll0185_ISGA	1498496	1498615	-	Bradyrhizobium
bll0190_ISGA	1543527	1543658	-	Bradyrhizobium
blr0191_ISGA	1548900	1549070	+	Bradyrhizobium japonicum
bll0194_ISGA	1574327	1574473	-	Bradyrhizobium japonicum
bll0196_ISGA	1598277	1598408	-	Bradyrhizobium
blr0199_ISGA	1661576	1661737	+	Bradyrhizobium japonicum
blr0200_ISGA	1671022	1671252	+	Bradyrhizobium japonicum
blr0202_ISGA	1673137	1673283	+	Bradyrhizobium japonicum
blr0211_ISGA	1730146	1730271	+	Bradyrhizobium
blr0218_ISGA	1763145	1763327	+	Alphaproteobacteria
blr0254_ISGA	1860294	1860455	+	Other
blr0257_ISGA	1884664	1884843	+	Alphaproteobacteria
bll0271_ISGA	1954954	1955085	-	Bradyrhizobium
blr0283_ISGA	1995140	1995376	+	Bradyrhizobium
bll0373_ISGA	2335218	2335346	-	Alphaproteobacteria
bll0382_ISGA	2397812	2397964	-	Bradyrhizobium
bll0383_ISGA	2402290	2402406	-	Bradyrhizobium
bll0384_ISGA	2408993	2409169	-	Alphaproteobacteria
bll0385_ISGA	2409179	2409412	-	Bradyrhizobium
bll0386_ISGA	2415768	2415935	-	Bradyrhizobium
blr0387_ISGA	2429308	2429454	+	Bradyrhizobium japonicum
blr0388_ISGA	2431155	2431304	+	Bradyrhizobium japonicum
blr0389_ISGA	2431319	2431465	+	Bradyrhizobium
bll0391_ISGA	2431930	2432157	-	Alphaproteobacteria
bll0392_ISGA	2434066	2434263	-	Bradyrhizobium
blr0396_ISGA	2453792	2454004	+	Bradyrhizobium
blr0400_ISGA	2526553	2526708	+	Bradyrhizobium japonicum
bll0403_ISGA	2557549	2557722	-	Bradyrhizobium
bll0404_ISGA	2557879	2558001	-	Bradyrhizobium japonicum
blr0405_ISGA	2558459	2558662	+	Bradyrhizobium
bll0408_ISGA	2560912	2561073	-	Bradyrhizobium
blr0412_ISGA	2592808	2592951	+	Bradyrhizobium
bll0413_ISGA	2595452	2595601	-	Bradyrhizobium japonicum
bll0417_ISGA	2626492	2626638	-	Bradyrhizobium
blr0418_ISGA	2632436	2632624	+	Bradyrhizobium japonicum
bll0420_ISGA	2633025	2633156	-	Bradyrhizobium
blr0421_ISGA	2633155	2633298	+	Bradyrhizobium
bll0424_ISGA	2650852	2650989	-	Bradyrhizobium
blr0425_ISGA	2653297	2653428	+	Bradyrhizobium japonicum
blr0433_ISGA	2704203	2704391	+	Bradyrhizobium
blr0434_ISGA	2724267	2724383	+	Bradyrhizobium
blr0440_ISGA	2769549	2769740	+	Alphaproteobacteria
blr0441_ISGA	2773840	2773995	+	Alphaproteobacteria
blr0442_ISGA	2777305	2777424	+	Bradyrhizobium japonicum
blr0443_ISGA	2786486	2786719	+	Bradyrhizobium
blr0444_ISGA	2790886	2791023	+	Bradyrhizobium japonicum
bll0447_ISGA	2815857	2815970	-	Bradyrhizobium
blr0448_ISGA	2821650	2821859	+	Bradyrhizobium
blr0449_ISGA	2821965	2822105	+	Bradyrhizobium japonicum
blr0450_ISGA	2834440	2834652	+	Bradyrhizobium
bll0451_ISGA	2837411	2837539	-	Bradyrhizobium japonicum
bll0452_ISGA	2838280	2838474	-	Bradyrhizobium
blr0453_ISGA	2838830	2839036	+	Bradyrhizobium
blr0455_ISGA	2848798	2848950	+	Bradyrhizobium
blr0456_ISGA	2849059	2849190	+	Bradyrhizobium
blr0457_ISGA	2850074	2850232	+	Bradyrhizobium
blr0458_ISGA	2850216	2850407	+	Alphaproteobacteria
blr0461_ISGA	2851394	2851552	+	Bradyrhizobium
bll0462_ISGA	2857661	2857882	-	Bradyrhizobium japonicum
blr0463_ISGA	2868871	2868993	+	Bradyrhizobium
blr0464_ISGA	2872295	2872513	+	Bradyrhizobium
blr0466_ISGA	2898863	2898982	+	Bradyrhizobium
bll0469_ISGA	2908323	2908484	-	Other
bll0471_ISGA	2921207	2921383	-	Alphaproteobacteria
bll0482_ISGA	2976214	2976378	-	Bradyrhizobium
bll0483_ISGA	2979570	2979755	-	Bradyrhizobium japonicum
blr0490_ISGA	3029670	3029837	+	Bradyrhizobium japonicum
blr0492_ISGA	3063943	3064083	+	Bradyrhizobium japonicum
bll0494_ISGA	3108082	3108264	-	Bradyrhizobium
blr0507_ISGA	3311341	3311499	+	Bradyrhizobium japonicum
bll0509_ISGA	3320539	3320673	-	Bradyrhizobium
bll0510_ISGA	3323800	3323919	-	Bradyrhizobium
blr0511_ISGA	3328715	3328864	+	Bradyrhizobium
bll0512_ISGA	3342902	3343036	-	Bradyrhizobium japonicum
blr0515_ISGA	3394484	3394672	+	Bradyrhizobium
blr0517_ISGA	3419889	3420062	+	Bradyrhizobium
bll0520_ISGA	3443941	3444177	-	Bradyrhizobium
bll0523_ISGA	3468831	3468959	-	Bradyrhizobium
bll0524_ISGA	3477968	3478171	-	Bradyrhizobium japonicum
blr0525_ISGA	3479790	3479903	+	Bradyrhizobium japonicum
blr0526_ISGA	3485382	3485585	+	Bradyrhizobium
bll0527_ISGA	3485698	3485835	-	Bradyrhizobium
bll0529_ISGA	3489911	3490093	-	Bradyrhizobium
bll0531_ISGA	3510736	3510969	-	Bradyrhizobium
bll0546_ISGA	3790126	3790269	-	Bradyrhizobium japonicum
bll0568_ISGA	4084467	4084679	-	Bradyrhizobium japonicum
bll0576_ISGA	4174316	4174501	-	Bradyrhizobium
blr0588_ISGA	4227016	4227159	+	Bradyrhizobium
blr0590_ISGA	4228538	4228705	+	Bradyrhizobium
blr0594_ISGA	4276553	4276666	+	Bradyrhizobium
blr0596_ISGA	4281198	4281335	+	Bradyrhizobium
bll0597_ISGA	4282004	4282195	-	Bradyrhizobium japonicum
bll0602_ISGA	4317245	4317406	-	Bradyrhizobium japonicum
bll0607_ISGA	4346674	4346826	-	Bradyrhizobium japonicum
bll0619_ISGA	4466561	4466704	-	Bradyrhizobium
blr0622_ISGA	4502829	4503047	+	Bradyrhizobium japonicum
bll0623_ISGA	4506176	4506295	-	Bradyrhizobium
blr0624_ISGA	4506437	4506643	+	Bradyrhizobium
bll0625_ISGA	4513045	4513272	-	Bradyrhizobium
bll0630_ISGA	4530572	4530793	-	Bradyrhizobium
bll0631_ISGA	4530846	4531022	-	Bradyrhizobium
bll0635_ISGA	4555923	4556102	-	Bradyrhizobium japonicum
blr0636_ISGA	4569313	4569486	+	Bradyrhizobium japonicum
blr0637_ISGA	4572368	4572484	+	Bradyrhizobium
blr0638_ISGA	4580470	4580604	+	Bradyrhizobium
blr0640_ISGA	4593438	4593602	+	Bradyrhizobium
bll0644_ISGA	4608361	4608480	-	Bradyrhizobium japonicum
bll0649_ISGA	4616327	4616488	-	Bradyrhizobium
blr0655_ISGA	4630521	4630679	+	Bradyrhizobium
blr0660_ISGA	4644236	4644373	+	Bradyrhizobium japonicum
bll0662_ISGA	4654837	4655067	-	Bradyrhizobium
blr0663_ISGA	4669925	4670095	+	Bradyrhizobium
blr0664_ISGA	4671039	4671176	+	Bradyrhizobium japonicum
blr0665_ISGA	4671212	4671358	+	Bradyrhizobium
blr0670_ISGA	4680740	4680853	+	Bradyrhizobium japonicum
blr0672_ISGA	4718687	4718818	+	Bradyrhizobium
blr0673_ISGA	4726213	4726380	+	Bradyrhizobium
blr0674_ISGA	4737294	4737479	+	Bradyrhizobium japonicum
bll0675_ISGA	4766233	4766382	-	Bradyrhizobium
blr0676_ISGA	4776739	4776852	+	Bradyrhizobium japonicum
blr0678_ISGA	4785302	4785541	+	Bradyrhizobium
bll0680_ISGA	4812547	4812732	-	Other
blr0683_ISGA	4845139	4845252	+	Bradyrhizobium japonicum
bll0685_ISGA	4856276	4856431	-	Bradyrhizobium
bll0688_ISGA	4860695	4860808	-	Bradyrhizobium
blr0689_ISGA	4861523	4861723	+	Alphaproteobacteria
bll0692_ISGA	4866034	4866219	-	Bradyrhizobium
blr0693_ISGA	4867417	4867554	+	Bradyrhizobium
bll0697_ISGA	4868770	4869000	-	Bradyrhizobium
bll0698_ISGA	4869640	4869810	-	Bradyrhizobium
bll0699_ISGA	4872546	4872740	-	Bradyrhizobium
bll0700_ISGA	4872784	4872948	-	Bradyrhizobium
blr0702_ISGA	4873813	4874007	+	Bradyrhizobium
bll0706_ISGA	4912309	4912461	-	Bradyrhizobium
blr0708_ISGA	4936357	4936503	+	Bradyrhizobium
bll0709_ISGA	4940230	4940358	-	Bradyrhizobium japonicum
blr0710_ISGA	4945373	4945486	+	Bradyrhizobium japonicum
bll0714_ISGA	4970941	4971057	-	Bradyrhizobium japonicum
blr0715_ISGA	4986221	4986388	+	Bradyrhizobium japonicum
blr0719_ISGA	5010777	5010905	+	Bradyrhizobium
blr0721_ISGA	5012655	5012870	+	Bradyrhizobium
bll0722_ISGA	5012926	5013117	-	Bradyrhizobium
bll0729_ISGA	5022236	5022388	-	Alphaproteobacteria
blr0732_ISGA	5044580	5044783	+	Bradyrhizobium
bll0735_ISGA	5069424	5069555	-	Bradyrhizobium
bll0737_ISGA	5086452	5086580	-	Bradyrhizobium
blr0739_ISGA	5103831	5103968	+	Bradyrhizobium
blr0740_ISGA	5104099	5104317	+	Alphaproteobacteria
bll0741_ISGA	5109783	5109902	-	Bradyrhizobium
bll0742_ISGA	5113630	5113749	-	Bradyrhizobium japonicum
bll0751_ISGA	5121603	5121722	-	Alphaproteobacteria
blr0755_ISGA	5145209	5145421	+	Alphaproteobacteria
blr0757_ISGA	5163975	5164187	+	Bradyrhizobium
blr0758_ISGA	5165461	5165631	+	Alphaproteobacteria
blr0759_ISGA	5170322	5170561	+	Bradyrhizobium
blr0762_ISGA	5173940	5174167	+	Bradyrhizobium
bll0764_ISGA	5178012	5178224	-	Bradyrhizobium japonicum
blr0769_ISGA	5187345	5187575	+	Bradyrhizobium japonicum
bll0771_ISGA	5205330	5205467	-	Bradyrhizobium
blr0776_ISGA	5234462	5234617	+	Bradyrhizobium
bll0780_ISGA	5256355	5256477	-	Bradyrhizobium
bll0781_ISGA	5265770	5265886	-	Bradyrhizobium
bll0784_ISGA	5280461	5280685	-	Bradyrhizobium
bll0785_ISGA	5280778	5280978	-	Bradyrhizobium
bll0791_ISGA	5306102	5306215	-	Bradyrhizobium japonicum
blr0800_ISGA	5349964	5350164	+	Bradyrhizobium
bll0802_ISGA	5362390	5362548	-	Bradyrhizobium
bll0808_ISGA	5421246	5421422	-	Alphaproteobacteria
blr0810_ISGA	5452277	5452471	+	Bradyrhizobium japonicum
bll0816_ISGA	5502600	5502839	-	Bradyrhizobium japonicum
blr0817_ISGA	5507474	5507647	+	Bradyrhizobium
blr0819_ISGA	5526240	5526437	+	Bradyrhizobium
blr0830_ISGA	5573996	5574121	+	Bradyrhizobium japonicum
bll0833_ISGA	5597782	5597946	-	Bradyrhizobium japonicum
bll0837_ISGA	5606479	5606640	-	Bradyrhizobium
bll0848_ISGA	5702156	5702350	-	Bradyrhizobium
blr0850_ISGA	5705104	5705262	+	Bradyrhizobium
bll0851_ISGA	5707222	5707437	-	Alphaproteobacteria
blr0855_ISGA	5724424	5724600	+	Bradyrhizobium
bll0866_ISGA	5771631	5771756	-	Bradyrhizobium
blr0873_ISGA	5801672	5801824	+	Bradyrhizobium
bll0874_ISGA	5802672	5802896	-	Bradyrhizobium japonicum
bll0878_ISGA	5858126	5858314	-	Alphaproteobacteria
bll0880_ISGA	5866747	5866860	-	Bradyrhizobium
blr0888_ISGA	5904947	5905129	+	Bradyrhizobium
bll0890_ISGA	5941812	5941949	-	Bradyrhizobium
bll0894_ISGA	6000280	6000495	-	Bradyrhizobium
bll0896_ISGA	6007147	6007350	-	Alphaproteobacteria
bll0905_ISGA	6050851	6051036	-	Bradyrhizobium
blr0906_ISGA	6051048	6051197	+	Bradyrhizobium
blr0909_ISGA	6068108	6068293	+	Bradyrhizobium
bll0912_ISGA	6068993	6069112	-	Bradyrhizobium
bll0913_ISGA	6069878	6069991	-	Bradyrhizobium
bll0914_ISGA	6070846	6070977	-	Bradyrhizobium japonicum
blr0918_ISGA	6105242	6105364	+	Bradyrhizobium
bll0919_ISGA	6107454	6107648	-	Bradyrhizobium
blr0920_ISGA	6123156	6123293	+	Bradyrhizobium
blr0923_ISGA	6132423	6132539	+	Bradyrhizobium
blr0926_ISGA	6151807	6151944	+	Bradyrhizobium japonicum
blr0927_ISGA	6160703	6160831	+	Bradyrhizobium
bll0928_ISGA	6203413	6203580	-	Bradyrhizobium japonicum
blr0929_ISGA	6204024	6204158	+	Bradyrhizobium japonicum
blr0933_ISGA	6242235	6242414	+	Bradyrhizobium
blr0934_ISGA	6242439	6242630	+	Bradyrhizobium
bll0936_ISGA	6250326	6250451	-	Bradyrhizobium
blr0939_ISGA	6285845	6285970	+	Bradyrhizobium
blr0940_ISGA	6297182	6297382	+	Bradyrhizobium
bll0941_ISGA	6312517	6312654	-	Bradyrhizobium
blr0945_ISGA	6327586	6327708	+	Alphaproteobacteria
bll0947_ISGA	6328721	6328837	-	Bradyrhizobium
blr0948_ISGA	6330373	6330561	+	Bradyrhizobium
bll0952_ISGA	6333719	6333952	-	Bradyrhizobium japonicum
blr0955_ISGA	6352810	6353040	+	Bradyrhizobium
bll0959_ISGA	6459440	6459622	-	Bradyrhizobium
bll0960_ISGA	6503324	6503458	-	Bradyrhizobium
blr0965_ISGA	6557664	6557831	+	Bradyrhizobium
bll0969_ISGA	6635694	6635825	-	Bradyrhizobium
blr0970_ISGA	6658453	6658620	+	Bradyrhizobium
bll0971_ISGA	6674040	6674198	-	Bradyrhizobium
bll0972_ISGA	6676399	6676557	-	Bradyrhizobium japonicum
bll0974_ISGA	6694999	6695160	-	Bradyrhizobium japonicum
bll0976_ISGA	6717681	6717917	-	Bradyrhizobium
blr0981_ISGA	6728791	6728976	+	Bradyrhizobium
blr0985_ISGA	6731750	6731893	+	Bradyrhizobium japonicum
bll0986_ISGA	6731866	6732054	-	Bradyrhizobium
blr0987_ISGA	6744361	6744522	+	Bradyrhizobium
bll0988_ISGA	6745549	6745734	-	Bradyrhizobium
blr0989_ISGA	6750731	6750931	+	Bradyrhizobium
blr0991_ISGA	6753971	6754192	+	Bradyrhizobium
blr0995_ISGA	6794999	6795154	+	Bradyrhizobium
bll0997_ISGA	6802910	6803143	-	Bradyrhizobium
bll0998_ISGA	6803140	6803364	-	Bradyrhizobium
bll0999_ISGA	6814578	6814715	-	Bradyrhizobium
blr1001_ISGA	6831274	6831453	+	Bradyrhizobium japonicum
blr1002_ISGA	6841939	6842067	+	Bradyrhizobium
blr1003_ISGA	6845299	6845457	+	Bradyrhizobium
blr1006_ISGA	6877184	6877321	+	Bradyrhizobium japonicum
blr1026_ISGA	7091666	7091788	+	Bradyrhizobium japonicum
blr1030_ISGA	7114194	7114373	+	Alphaproteobacteria
bll1033_ISGA	7120244	7120408	-	Bradyrhizobium
blr1046_ISGA	7206108	7206245	+	Bradyrhizobium japonicum
blr1049_ISGA	7238971	7239180	+	Bradyrhizobium
bll1050_ISGA	7254822	7255001	-	Bradyrhizobium japonicum
blr1052_ISGA	7269737	7269913	+	Bradyrhizobium
blr1054_ISGA	7302452	7302565	+	Bradyrhizobium
bll1055_ISGA	7338811	7338963	-	Bradyrhizobium
blr1061_ISGA	7358001	7358198	+	Bradyrhizobium japonicum
bll1062_ISGA	7362158	7362280	-	Bradyrhizobium
blr1065_ISGA	7392936	7393118	+	Bradyrhizobium japonicum
bll1068_ISGA	7425061	7425198	-	Other
blr1071_ISGA	7480254	7480469	+	Bradyrhizobium japonicum
bll1072_ISGA	7480941	7481093	-	Bradyrhizobium
blr1073_ISGA	7484355	7484483	+	Bradyrhizobium
bll1077_ISGA	7501312	7501437	-	Bradyrhizobium japonicum
bll1078_ISGA	7514152	7514286	-	Bradyrhizobium
blr1083_ISGA	7578178	7578291	+	Bradyrhizobium japonicum
bll1084_ISGA	7579339	7579452	-	Bradyrhizobium japonicum
blr1087_ISGA	7597458	7597601	+	Bradyrhizobium japonicum
bll1091_ISGA	7661628	7661762	-	Bradyrhizobium
bll1103_ISGA	7720136	7720258	-	Alphaproteobacteria
blr1113_ISGA	7740942	7741100	+	Bradyrhizobium
bll1120_ISGA	7793621	7793743	-	Bradyrhizobium japonicum
bll1122_ISGA	7829541	7829663	-	Bradyrhizobium
blr1124_ISGA	7860123	7860248	+	Bradyrhizobium
bll1125_ISGA	7872402	7872539	-	Bradyrhizobium japonicum
bll1126_ISGA	7875035	7875178	-	Bradyrhizobium japonicum
bll1131_ISGA	7889310	7889456	-	Bradyrhizobium
bll1133_ISGA	7906493	7906609	-	Bradyrhizobium japonicum
blr1138_ISGA	7946991	7947224	+	Alphaproteobacteria
bll1140_ISGA	7958469	7958627	-	Bradyrhizobium japonicum
blr1142_ISGA	7993489	7993629	+	Bradyrhizobium
bll1156_ISGA	8078418	8078558	-	Bradyrhizobium japonicum
blr1158_ISGA	8087474	8087629	+	Bradyrhizobium
blr1163_ISGA	8106935	8107063	+	Bradyrhizobium japonicum
blr1166_ISGA	8123120	8123269	+	Bradyrhizobium
bll1168_ISGA	8141437	8141643	-	Bradyrhizobium
bll1169_ISGA	8148255	8148422	-	Bradyrhizobium
blr1170_ISGA	8149705	8149839	+	Bradyrhizobium japonicum
blr1172_ISGA	8157017	8157208	+	Bradyrhizobium japonicum
blr1173_ISGA	8158365	8158541	+	Bradyrhizobium
blr1174_ISGA	8168312	8168536	+	Bradyrhizobium
blr1175_ISGA	8168567	8168797	+	Bradyrhizobium
bll1176_ISGA	8171911	8172096	-	Bradyrhizobium
blr1177_ISGA	8172109	8172282	+	Bradyrhizobium
blr1179_ISGA	8176487	8176624	+	Bradyrhizobium
bll1184_ISGA	8219249	8219374	-	Alphaproteobacteria
bll1192_ISGA	8265281	8265406	-	Bradyrhizobium japonicum
blr1193_ISGA	8271167	8271349	+	Bradyrhizobium
blr1194_ISGA	8282303	8282485	+	Bradyrhizobium japonicum
blr1196_ISGA	8300158	8300280	+	Bradyrhizobium japonicum
blr1197_ISGA	8302654	8302788	+	Bradyrhizobium
bll1200_ISGA	8331567	8331785	-	Bradyrhizobium
bll1201_ISGA	8342274	8342465	-	Bradyrhizobium
blr1203_ISGA	8349836	8350060	+	Bradyrhizobium
bll1205_ISGA	8364704	8364844	-	Bradyrhizobium
bll1241_ISGA	8453629	8453769	-	Bradyrhizobium japonicum
bll1253_ISGA	8479860	8480078	-	Bradyrhizobium japonicum
bll1254_ISGA	8488674	8488805	-	Bradyrhizobium
bll1256_ISGA	8520036	8520272	-	Bradyrhizobium japonicum
bll1257_ISGA	8522345	8522485	-	Bradyrhizobium japonicum
bll1261_ISGA	8557335	8557505	-	Bradyrhizobium japonicum
bll1262_ISGA	8563803	8563952	-	Bradyrhizobium
blr1267_ISGA	8613882	8614115	+	Bradyrhizobium japonicum
bll1268_ISGA	8662990	8663124	-	Bradyrhizobium
bll1270_ISGA	8719953	8720099	-	Bradyrhizobium
bll1271_ISGA	8751774	8751887	-	Bradyrhizobium
bll1281_ISGA	8800776	8800907	-	Bradyrhizobium
bll1282_ISGA	8801201	8801320	-	Bradyrhizobium
bll1300_ISGA	8849741	8849974	-	Bradyrhizobium
bll1306_ISGA	8932601	8932771	-	Bradyrhizobium japonicum
blr1309_ISGA	8959161	8959367	+	Bradyrhizobium japonicum
bll1310_ISGA	8961256	8961375	-	Bradyrhizobium japonicum
bll1318_ISGA	9010016	9010171	-	Other
bll0001_ISGA	159	302	-	Bradyrhizobium japonicum
bll0002_ISGA	1916	2101	-	Bradyrhizobium japonicum
blr0003_ISGA	2086	2268	+	Bradyrhizobium japonicum
bll0004_ISGA	4154	4276	-	Bradyrhizobium japonicum
blr0005_ISGA	4836	4961	+	Bradyrhizobium japonicum
blr0006_ISGA	8504	8710	+	Bradyrhizobium japonicum
blr0015_ISGA	34300	34413	+	Bradyrhizobium japonicum
bll0016_ISGA	34970	35092	-	Bradyrhizobium japonicum
bll0017_ISGA	46926	47135	-	Alphaproteobacteria
bll0018_ISGA	50328	50468	-	Bradyrhizobium japonicum
blr0021_ISGA	59222	59380	+	Other
blr0022_ISGA	65919	66041	+	Bradyrhizobium japonicum
bll0023_ISGA	71942	72061	-	Bradyrhizobium japonicum
blr0036_ISGA	164444	164557	+	Bradyrhizobium japonicum
blr0038_ISGA	165149	165277	+	Bradyrhizobium japonicum
bll0041_ISGA	198829	198951	-	Bradyrhizobium japonicum
blr0042_ISGA	209595	209810	+	Bradyrhizobium japonicum
bll0043_ISGA	253096	253248	-	Bradyrhizobium japonicum
bll0049_ISGA	303029	303160	-	Bradyrhizobium japonicum
bll0052_ISGA	347060	347188	-	Bradyrhizobium japonicum
blr0054_ISGA	385793	385963	+	Bradyrhizobium
bll0060_ISGA	404098	404331	-	Bradyrhizobium japonicum
blr0062_ISGA	426134	426256	+	Bradyrhizobium japonicum
bll0065_ISGA	438896	439024	-	Bradyrhizobium japonicum
bll0066_ISGA	439049	439204	-	Bradyrhizobium japonicum
blr0067_ISGA	449972	450103	+	Bradyrhizobium japonicum
bll0069_ISGA	479665	479790	-	Bradyrhizobium japonicum
bll0071_ISGA	513503	513637	-	Bradyrhizobium japonicum
blr0073_ISGA	529253	529462	+	Bradyrhizobium
bll0079_ISGA	561712	561885	-	Bradyrhizobium japonicum
bll0081_ISGA	574207	574350	-	Bradyrhizobium japonicum
blr0087_ISGA	644669	644791	+	Bradyrhizobium japonicum
bll0088_ISGA	662746	662886	-	Bradyrhizobium japonicum
blr0089_ISGA	682370	682576	+	Bradyrhizobium japonicum
bll0093_ISGA	740006	740146	-	Bradyrhizobium japonicum
blr0094_ISGA	757253	757372	+	Bradyrhizobium japonicum
bll0097_ISGA	775710	775859	-	Bradyrhizobium japonicum
bll0100_ISGA	790040	790183	-	Bradyrhizobium japonicum
bll0110_ISGA	899250	899387	-	Bradyrhizobium japonicum
bll0117_ISGA	921550	921783	-	Bradyrhizobium japonicum
blr0118_ISGA	924570	924761	+	Bradyrhizobium japonicum
blr0119_ISGA	938381	938509	+	Bradyrhizobium japonicum
blr0120_ISGA	939443	939571	+	Bradyrhizobium japonicum
blr0122_ISGA	947149	947304	+	Other
bll0123_ISGA	951880	952005	-	Bradyrhizobium japonicum
bll0124_ISGA	953209	953355	-	Bradyrhizobium
blr0125_ISGA	963082	963195	+	Bradyrhizobium japonicum
bll0126_ISGA	987661	987777	-	Bradyrhizobium japonicum
blr0130_ISGA	1001169	1001336	+	Bradyrhizobium japonicum
bll0131_ISGA	1025204	1025350	-	Bradyrhizobium japonicum
blr0134_ISGA	1071354	1071509	+	Bradyrhizobium japonicum
blr0140_ISGA	1158961	1159152	+	Bradyrhizobium japonicum
blr0142_ISGA	1174680	1174799	+	Bradyrhizobium japonicum
blr0144_ISGA	1182930	1183043	+	Bradyrhizobium japonicum
bll0145_ISGA	1187676	1187849	-	Bradyrhizobium japonicum
blr0147_ISGA	1201046	1201273	+	Bradyrhizobium japonicum
bll0150_ISGA	1225934	1226173	-	Bradyrhizobium japonicum
blr0153_ISGA	1251664	1251879	+	Bradyrhizobium japonicum
blr0157_ISGA	1324274	1324405	+	Bradyrhizobium japonicum
bll0160_ISGA	1335294	1335422	-	Bradyrhizobium japonicum
blr0162_ISGA	1359822	1359998	+	Alphaproteobacteria
blr0165_ISGA	1374983	1375123	+	Bradyrhizobium japonicum
bll0167_ISGA	1382141	1382254	-	Bradyrhizobium japonicum
bll0168_ISGA	1382483	1382656	-	Bradyrhizobium japonicum
blr0170_ISGA	1391634	1391846	+	Bradyrhizobium japonicum
blr0171_ISGA	1393338	1393517	+	Bradyrhizobium japonicum
bll0172_ISGA	1420624	1420761	-	Bradyrhizobium japonicum
blr0174_ISGA	1424361	1424513	+	Bradyrhizobium japonicum
blr0179_ISGA	1455232	1455387	+	Bradyrhizobium japonicum
bll0183_ISGA	1474973	1475137	-	Bradyrhizobium japonicum
bll0188_ISGA	1535944	1536069	-	Bradyrhizobium japonicum
bll0192_ISGA	1560873	1561103	-	Bradyrhizobium japonicum
bll0197_ISGA	1602358	1602573	-	Bradyrhizobium japonicum
blr0198_ISGA	1647336	1647488	+	Bradyrhizobium japonicum
blr0201_ISGA	1671210	1671353	+	Bradyrhizobium japonicum
bll0203_ISGA	1683376	1683546	-	Bradyrhizobium japonicum
bll0204_ISGA	1685188	1685424	-	Bradyrhizobium japonicum
blr0205_ISGA	1689181	1689306	+	Bradyrhizobium japonicum
blr0206_ISGA	1689371	1689487	+	Bradyrhizobium japonicum
bll0207_ISGA	1690034	1690186	-	Bradyrhizobium japonicum
blr0208_ISGA	1692175	1692324	+	Bradyrhizobium japonicum
blr0209_ISGA	1700716	1700907	+	Bradyrhizobium japonicum
blr0210_ISGA	1708583	1708810	+	Bradyrhizobium japonicum
blr0212_ISGA	1732378	1732530	+	Bradyrhizobium japonicum
blr0216_ISGA	1743197	1743385	+	Bradyrhizobium japonicum
bll0217_ISGA	1748736	1748885	-	Bradyrhizobium japonicum
bll0219_ISGA	1763665	1763781	-	Bradyrhizobium japonicum
bll0222_ISGA	1778189	1778383	-	Bradyrhizobium japonicum
blr0223_ISGA	1779080	1779250	+	Bradyrhizobium japonicum
blr0224_ISGA	1781323	1781451	+	Bradyrhizobium japonicum
bll0225_ISGA	1781910	1782095	-	Bradyrhizobium japonicum
blr0226_ISGA	1783729	1783950	+	Other
bll0227_ISGA	1793778	1793993	-	Bradyrhizobium japonicum
blr0228_ISGA	1795413	1795538	+	Bradyrhizobium japonicum
blr0231_ISGA	1798032	1798244	+	Bradyrhizobium japonicum
bll0232_ISGA	1799564	1799686	-	Bradyrhizobium japonicum
bll0235_ISGA	1804159	1804359	-	Bradyrhizobium japonicum
bll0236_ISGA	1805580	1805771	-	Bradyrhizobium japonicum
blr0237_ISGA	1811280	1811429	+	Bradyrhizobium japonicum
blr0238_ISGA	1811440	1811622	+	Bradyrhizobium japonicum
blr0239_ISGA	1811828	1811947	+	Bradyrhizobium japonicum
blr0242_ISGA	1816595	1816795	+	Bradyrhizobium japonicum
bll0243_ISGA	1816855	1817052	-	Bradyrhizobium japonicum
blr0247_ISGA	1834243	1834389	+	Bradyrhizobium japonicum
bll0248_ISGA	1838180	1838362	-	Bradyrhizobium japonicum
blr0251_ISGA	1855414	1855635	+	Bradyrhizobium japonicum
blr0252_ISGA	1855662	1855778	+	Bradyrhizobium japonicum
blr0253_ISGA	1856849	1857058	+	Bradyrhizobium japonicum
blr0258_ISGA	1886977	1887162	+	Bradyrhizobium japonicum
blr0259_ISGA	1904384	1904566	+	Bradyrhizobium japonicum
bll0260_ISGA	1906119	1906283	-	Bradyrhizobium japonicum
bll0261_ISGA	1921065	1921199	-	Bradyrhizobium japonicum
bll0264_ISGA	1927270	1927392	-	Bradyrhizobium japonicum
blr0265_ISGA	1927442	1927558	+	Bradyrhizobium japonicum
bll0266_ISGA	1932126	1932245	-	Bradyrhizobium japonicum
blr0267_ISGA	1937337	1937465	+	Bradyrhizobium japonicum
blr0268_ISGA	1943969	1944091	+	Bradyrhizobium japonicum
bll0269_ISGA	1952667	1952858	-	Bradyrhizobium japonicum
blr0270_ISGA	1953116	1953232	+	Bradyrhizobium japonicum
bll0272_ISGA	1959357	1959548	-	Bradyrhizobium japonicum
blr0273_ISGA	1964684	1964848	+	Bradyrhizobium japonicum
bll0274_ISGA	1965295	1965408	-	Bradyrhizobium japonicum
blr0275_ISGA	1975602	1975718	+	Alphaproteobacteria
blr0277_ISGA	1978534	1978719	+	Other
blr0278_ISGA	1981399	1981524	+	Bradyrhizobium japonicum
bll0280_ISGA	1987000	1987134	-	Bradyrhizobium japonicum
bll0284_ISGA	1997488	1997685	-	Bradyrhizobium japonicum
blr0285_ISGA	1998626	1998760	+	Bradyrhizobium japonicum
blr0286_ISGA	2001173	2001313	+	Bradyrhizobium japonicum
blr0287_ISGA	2003456	2003572	+	Bradyrhizobium japonicum
blr0288_ISGA	2009055	2009231	+	Bradyrhizobium japonicum
bll0289_ISGA	2014523	2014690	-	Bradyrhizobium japonicum
bll0290_ISGA	2019497	2019625	-	Bradyrhizobium japonicum
bll0291_ISGA	2021062	2021190	-	Bradyrhizobium japonicum
bll0292_ISGA	2023771	2023935	-	Bradyrhizobium japonicum
blr0293_ISGA	2023934	2024101	+	Bradyrhizobium japonicum
blr0294_ISGA	2029370	2029504	+	Bradyrhizobium japonicum
blr0295_ISGA	2029517	2029636	+	Bradyrhizobium japonicum
blr0296_ISGA	2032162	2032308	+	Bradyrhizobium japonicum
blr0297_ISGA	2035378	2035491	+	Bradyrhizobium japonicum
blr0299_ISGA	2039399	2039518	+	Bradyrhizobium japonicum
blr0300_ISGA	2040507	2040620	+	Bradyrhizobium japonicum
blr0303_ISGA	2058292	2058519	+	Bradyrhizobium japonicum
blr0304_ISGA	2058628	2058801	+	Bradyrhizobium japonicum
bll0306_ISGA	2059596	2059742	-	Bradyrhizobium japonicum
blr0307_ISGA	2061537	2061707	+	Bradyrhizobium japonicum
bll0308_ISGA	2061727	2061861	-	Bradyrhizobium japonicum
blr0313_ISGA	2086821	2086979	+	Bradyrhizobium japonicum
bll0314_ISGA	2090223	2090450	-	Alphaproteobacteria
blr0319_ISGA	2105888	2106028	+	Bradyrhizobium japonicum
bll0320_ISGA	2109893	2110039	-	Bradyrhizobium japonicum
blr0321_ISGA	2114926	2115126	+	Bradyrhizobium japonicum
blr0322_ISGA	2117756	2117947	+	Bradyrhizobium japonicum
blr0324_ISGA	2124144	2124326	+	Bradyrhizobium japonicum
bll0325_ISGA	2125626	2125739	-	Bradyrhizobium japonicum
blr0330_ISGA	2139899	2140066	+	Bradyrhizobium japonicum
blr0331_ISGA	2149316	2149432	+	Bradyrhizobium japonicum
blr0332_ISGA	2149744	2149860	+	Bradyrhizobium japonicum
blr0333_ISGA	2150138	2150269	+	Bradyrhizobium japonicum
bll0337_ISGA	2166676	2166834	-	Bradyrhizobium japonicum
bll0338_ISGA	2167134	2167268	-	Bradyrhizobium japonicum
bll0339_ISGA	2172689	2172829	-	Other
blr0340_ISGA	2174261	2174377	+	Bradyrhizobium japonicum
bll0342_ISGA	2182120	2182278	-	Bradyrhizobium japonicum
blr0344_ISGA	2200272	2200421	+	Bradyrhizobium japonicum
bll0345_ISGA	2201849	2201983	-	Other
bll0346_ISGA	2207017	2207181	-	Bradyrhizobium japonicum
bll0347_ISGA	2212099	2212233	-	Bradyrhizobium japonicum
bll0349_ISGA	2217093	2217209	-	Bradyrhizobium japonicum
bll0350_ISGA	2219355	2219492	-	Bradyrhizobium japonicum
bll0351_ISGA	2223116	2223229	-	Bradyrhizobium japonicum
bll0352_ISGA	2236261	2236428	-	Bradyrhizobium japonicum
blr0353_ISGA	2237495	2237677	+	Bradyrhizobium japonicum
blr0354_ISGA	2237838	2238026	+	Bradyrhizobium japonicum
bll0355_ISGA	2239643	2239759	-	Bradyrhizobium japonicum
blr0357_ISGA	2270411	2270620	+	Bradyrhizobium japonicum
bll0358_ISGA	2271858	2271980	-	Other
bll0359_ISGA	2274306	2274509	-	Bradyrhizobium
bll0360_ISGA	2274773	2274931	-	Bradyrhizobium japonicum
bll0362_ISGA	2299636	2299800	-	Bradyrhizobium japonicum
blr0363_ISGA	2303522	2303740	+	Bradyrhizobium japonicum
bll0364_ISGA	2304735	2304938	-	Bradyrhizobium japonicum
bll0365_ISGA	2308789	2308941	-	Alphaproteobacteria
blr0366_ISGA	2312149	2312316	+	Bradyrhizobium japonicum
bll0367_ISGA	2314591	2314725	-	Bradyrhizobium japonicum
bll0369_ISGA	2327293	2327421	-	Bradyrhizobium japonicum
bll0370_ISGA	2327775	2327927	-	Bradyrhizobium japonicum
bll0372_ISGA	2334715	2334831	-	Bradyrhizobium japonicum
bll0374_ISGA	2339215	2339421	-	Bradyrhizobium japonicum
bll0375_ISGA	2339463	2339666	-	Other
bll0376_ISGA	2339680	2339898	-	Bradyrhizobium japonicum
blr0377_ISGA	2356005	2356184	+	Bradyrhizobium japonicum
blr0390_ISGA	2431847	2431969	+	Bradyrhizobium japonicum
blr0394_ISGA	2453313	2453525	+	Bradyrhizobium japonicum
blr0395_ISGA	2453604	2453795	+	Bradyrhizobium japonicum
blr0398_ISGA	2473095	2473211	+	Bradyrhizobium japonicum
blr0399_ISGA	2496361	2496504	+	Bradyrhizobium japonicum
bll0409_ISGA	2568765	2568881	-	Bradyrhizobium japonicum
blr0410_ISGA	2584231	2584365	+	Bradyrhizobium japonicum
bll0411_ISGA	2584351	2584530	-	Bradyrhizobium japonicum
bll0414_ISGA	2603007	2603144	-	Bradyrhizobium japonicum
bll0415_ISGA	2608603	2608752	-	Bradyrhizobium japonicum
bll0416_ISGA	2620080	2620217	-	Bradyrhizobium japonicum
blr0426_ISGA	2663427	2663582	+	Bradyrhizobium japonicum
blr0430_ISGA	2680552	2680737	+	Bradyrhizobium japonicum
bll0431_ISGA	2695853	2696071	-	Bradyrhizobium japonicum
bll0436_ISGA	2741961	2742101	-	Bradyrhizobium japonicum
blr0445_ISGA	2814651	2814803	+	Bradyrhizobium japonicum
bll0459_ISGA	2850420	2850533	-	Bradyrhizobium japonicum
bll0460_ISGA	2850634	2850861	-	Bradyrhizobium japonicum
blr0467_ISGA	2903432	2903608	+	Bradyrhizobium japonicum
bll0470_ISGA	2913123	2913272	-	Bradyrhizobium japonicum
blr0472_ISGA	2926643	2926867	+	Bradyrhizobium japonicum
bll0473_ISGA	2947484	2947597	-	Bradyrhizobium japonicum
blr0474_ISGA	2951632	2951826	+	Bradyrhizobium japonicum
blr0475_ISGA	2953555	2953701	+	Bradyrhizobium japonicum
blr0478_ISGA	2970047	2970160	+	Bradyrhizobium japonicum
bll0485_ISGA	3006862	3006978	-	Bradyrhizobium japonicum
blr0486_ISGA	3009848	3010012	+	Bradyrhizobium japonicum
bll0488_ISGA	3017905	3018093	-	Bradyrhizobium japonicum
blr0489_ISGA	3019699	3019839	+	Bradyrhizobium japonicum
blr0491_ISGA	3058531	3058647	+	Bradyrhizobium japonicum
bll0493_ISGA	3083530	3083709	-	Bradyrhizobium japonicum
blr0495_ISGA	3112078	3112197	+	Bradyrhizobium japonicum
blr0497_ISGA	3140945	3141082	+	Bradyrhizobium japonicum
bll0498_ISGA	3150275	3150496	-	Bradyrhizobium japonicum
bll0500_ISGA	3180553	3180672	-	Bradyrhizobium japonicum
bll0504_ISGA	3300297	3300428	-	Bradyrhizobium japonicum
bll0505_ISGA	3303198	3303368	-	Bradyrhizobium japonicum
blr0514_ISGA	3392495	3392611	+	Bradyrhizobium japonicum
blr0516_ISGA	3401062	3401295	+	Bradyrhizobium japonicum
blr0519_ISGA	3443018	3443227	+	Bradyrhizobium japonicum
blr0521_ISGA	3445292	3445447	+	Bradyrhizobium japonicum
bll0534_ISGA	3575444	3575659	-	Bradyrhizobium japonicum
blr0535_ISGA	3575794	3576030	+	Bradyrhizobium japonicum
blr0536_ISGA	3576108	3576296	+	Bradyrhizobium japonicum
blr0539_ISGA	3708078	3708296	+	Bradyrhizobium japonicum
blr0540_ISGA	3727502	3727735	+	Bradyrhizobium japonicum
blr0541_ISGA	3752563	3752703	+	Bradyrhizobium japonicum
blr0542_ISGA	3762873	3763034	+	Bradyrhizobium japonicum
bll0543_ISGA	3771738	3771854	-	Alphaproteobacteria
blr0544_ISGA	3780944	3781129	+	Bradyrhizobium japonicum
blr0545_ISGA	3789434	3789613	+	Bradyrhizobium japonicum
bll0547_ISGA	3795168	3795323	-	Bradyrhizobium japonicum
blr0548_ISGA	3795443	3795583	+	Bradyrhizobium japonicum
bll0550_ISGA	3833240	3833410	-	Bradyrhizobium japonicum
blr0551_ISGA	3833512	3833637	+	Alphaproteobacteria
blr0553_ISGA	3849080	3849202	+	Bradyrhizobium japonicum
bll0554_ISGA	3851605	3851784	-	Bradyrhizobium japonicum
bll0555_ISGA	3857640	3857759	-	Bradyrhizobium japonicum
blr0557_ISGA	3877554	3877682	+	Bradyrhizobium japonicum
bll0558_ISGA	3928519	3928671	-	Bradyrhizobium japonicum
blr0559_ISGA	3929919	3930101	+	Bradyrhizobium japonicum
blr0560_ISGA	3940894	3941064	+	Bradyrhizobium japonicum
blr0561_ISGA	3954047	3954253	+	Bradyrhizobium japonicum
bll0562_ISGA	3997351	3997491	-	Bradyrhizobium japonicum
blr0563_ISGA	4029126	4029290	+	Bradyrhizobium japonicum
blr0565_ISGA	4065175	4065381	+	Bradyrhizobium japonicum
blr0566_ISGA	4078876	4079058	+	Other
bll0567_ISGA	4079275	4079388	-	Bradyrhizobium japonicum
bll0569_ISGA	4084727	4084864	-	Bradyrhizobium japonicum
bll0571_ISGA	4106043	4106213	-	Bradyrhizobium japonicum
blr0572_ISGA	4155715	4155861	+	Bradyrhizobium japonicum
blr0573_ISGA	4171044	4171166	+	Bradyrhizobium
blr0575_ISGA	4174128	4174331	+	Bradyrhizobium japonicum
bll0577_ISGA	4176756	4176893	-	Bradyrhizobium japonicum
blr0580_ISGA	4197395	4197514	+	Bradyrhizobium japonicum
bll0585_ISGA	4225691	4225828	-	Bradyrhizobium japonicum
bll0586_ISGA	4226585	4226740	-	Bradyrhizobium japonicum
blr0587_ISGA	4226745	4226879	+	Bradyrhizobium japonicum
blr0589_ISGA	4228269	4228412	+	Bradyrhizobium japonicum
blr0593_ISGA	4253917	4254039	+	Bradyrhizobium japonicum
blr0600_ISGA	4289016	4289195	+	Bradyrhizobium japonicum
bll0604_ISGA	4320758	4320880	-	Bradyrhizobium japonicum
blr0605_ISGA	4324381	4324506	+	Bradyrhizobium
blr0616_ISGA	4441768	4441920	+	Bradyrhizobium japonicum
blr0617_ISGA	4445568	4445726	+	Bradyrhizobium japonicum
blr0618_ISGA	4462377	4462520	+	Bradyrhizobium japonicum
blr0621_ISGA	4485071	4485202	+	Bradyrhizobium japonicum
blr0628_ISGA	4528705	4528842	+	Bradyrhizobium japonicum
bll0632_ISGA	4531065	4531256	-	Bradyrhizobium japonicum
bll0633_ISGA	4531465	4531695	-	Bradyrhizobium
blr0639_ISGA	4590290	4590412	+	Bradyrhizobium japonicum
blr0645_ISGA	4613316	4613438	+	Bradyrhizobium japonicum
bll0647_ISGA	4614674	4614859	-	Bradyrhizobium japonicum
bll0648_ISGA	4615100	4615276	-	Bradyrhizobium japonicum
blr0650_ISGA	4617255	4617431	+	Bradyrhizobium japonicum
bll0651_ISGA	4621344	4621547	-	Bradyrhizobium japonicum
blr0652_ISGA	4625658	4625801	+	Bradyrhizobium japonicum
blr0653_ISGA	4628102	4628215	+	Bradyrhizobium japonicum
bll0654_ISGA	4628184	4628366	-	Bradyrhizobium japonicum
blr0658_ISGA	4641633	4641785	+	Bradyrhizobium japonicum
blr0659_ISGA	4642230	4642343	+	Bradyrhizobium japonicum
blr0666_ISGA	4671459	4671578	+	Bradyrhizobium japonicum
bll0669_ISGA	4677860	4678027	-	-
bll0677_ISGA	4783446	4783574	-	Bradyrhizobium japonicum
blr0690_ISGA	4865222	4865425	+	Bradyrhizobium japonicum
blr0694_ISGA	4867551	4867685	+	Bradyrhizobium japonicum
blr0695_ISGA	4867772	4867888	+	Bradyrhizobium japonicum
blr0696_ISGA	4868058	4868261	+	Bradyrhizobium japonicum
blr0701_ISGA	4873175	4873339	+	Bradyrhizobium japonicum
bll0703_ISGA	4896408	4896554	-	Bradyrhizobium japonicum
bll0707_ISGA	4925392	4925526	-	Bradyrhizobium japonicum
bll0713_ISGA	4964675	4964866	-	Bradyrhizobium japonicum
blr0716_ISGA	4990322	4990540	+	Alphaproteobacteria
bll0718_ISGA	4994367	4994600	-	Bradyrhizobium japonicum
blr0724_ISGA	5016405	5016596	+	Alphaproteobacteria
blr0725_ISGA	5016601	5016789	+	Bradyrhizobium japonicum
blr0726_ISGA	5019966	5020163	+	Bradyrhizobium japonicum
blr0727_ISGA	5020163	5020366	+	Bradyrhizobium japonicum
blr0728_ISGA	5022075	5022206	+	Bradyrhizobium japonicum
blr0730_ISGA	5027790	5027978	+	Bradyrhizobium japonicum
bll0731_ISGA	5028127	5028267	-	Bradyrhizobium japonicum
blr0733_ISGA	5044935	5045084	+	Bradyrhizobium japonicum
bll0734_ISGA	5046602	5046724	-	Bradyrhizobium japonicum
bll0738_ISGA	5092760	5092924	-	Bradyrhizobium japonicum
bll0744_ISGA	5115614	5115742	-	Bradyrhizobium japonicum
blr0746_ISGA	5118059	5118256	+	Bradyrhizobium japonicum
blr0747_ISGA	5118400	5118534	+	Bradyrhizobium japonicum
blr0748_ISGA	5119264	5119398	+	Bradyrhizobium japonicum
bll0749_ISGA	5120104	5120223	-	Bradyrhizobium japonicum
bll0750_ISGA	5120767	5120889	-	Bradyrhizobium japonicum
bll0752_ISGA	5126630	5126788	-	Bradyrhizobium japonicum
bll0753_ISGA	5130785	5130997	-	Bradyrhizobium japonicum
blr0754_ISGA	5138994	5139209	+	Bradyrhizobium
bll0756_ISGA	5156779	5156910	-	Bradyrhizobium japonicum
blr0760_ISGA	5170596	5170751	+	Bradyrhizobium japonicum
bll0763_ISGA	5175726	5175953	-	Bradyrhizobium japonicum
bll0770_ISGA	5196989	5197162	-	Bradyrhizobium
bll0772_ISGA	5209669	5209806	-	Bradyrhizobium japonicum
bll0774_ISGA	5220941	5221105	-	Bradyrhizobium japonicum
bll0775_ISGA	5233949	5234116	-	Bradyrhizobium japonicum
blr0778_ISGA	5253274	5253459	+	Bradyrhizobium japonicum
bll0786_ISGA	5285792	5285965	-	Bradyrhizobium japonicum
blr0788_ISGA	5293115	5293306	+	Bradyrhizobium japonicum
bll0789_ISGA	5294789	5295022	-	Bradyrhizobium
bll0790_ISGA	5301394	5301603	-	Bradyrhizobium japonicum
blr0792_ISGA	5308095	5308220	+	Bradyrhizobium japonicum
blr0793_ISGA	5312494	5312637	+	Bradyrhizobium japonicum
bll0796_ISGA	5342436	5342579	-	Bradyrhizobium japonicum
bll0797_ISGA	5342586	5342738	-	Bradyrhizobium japonicum
blr0799_ISGA	5347155	5347370	+	Bradyrhizobium
bll0809_ISGA	5423766	5423894	-	Bradyrhizobium japonicum
blr0813_ISGA	5480369	5480527	+	Bradyrhizobium japonicum
blr0820_ISGA	5530977	5531123	+	Bradyrhizobium
bll0821_ISGA	5532359	5532529	-	Other
bll0822_ISGA	5535367	5535537	-	Bradyrhizobium japonicum
blr0824_ISGA	5540101	5540331	+	Bradyrhizobium japonicum
bll0825_ISGA	5546845	5546994	-	Bradyrhizobium japonicum
blr0826_ISGA	5550364	5550534	+	Bradyrhizobium japonicum
bll0828_ISGA	5562576	5562725	-	Bradyrhizobium japonicum
bll0829_ISGA	5571492	5571608	-	Bradyrhizobium japonicum
blr0832_ISGA	5593054	5593173	+	Bradyrhizobium japonicum
bll0835_ISGA	5605542	5605673	-	Bradyrhizobium japonicum
bll0836_ISGA	5605628	5605810	-	Bradyrhizobium japonicum
blr0839_ISGA	5640972	5641139	+	Bradyrhizobium japonicum
bll0844_ISGA	5673007	5673240	-	Bradyrhizobium japonicum
bll0845_ISGA	5685950	5686105	-	Bradyrhizobium japonicum
blr0846_ISGA	5693919	5694038	+	Bradyrhizobium japonicum
bll0849_ISGA	5702604	5702738	-	Bradyrhizobium japonicum
blr0853_ISGA	5710366	5710479	+	Bradyrhizobium japonicum
blr0856_ISGA	5737336	5737461	+	Bradyrhizobium japonicum
bll0857_ISGA	5739906	5740061	-	Other
blr0858_ISGA	5751325	5751546	+	Bradyrhizobium
blr0860_ISGA	5752779	5752898	+	Bradyrhizobium japonicum
bll0862_ISGA	5763575	5763724	-	Bradyrhizobium japonicum
bll0863_ISGA	5767863	5767979	-	Bradyrhizobium japonicum
bll0864_ISGA	5769852	5770055	-	Other
blr0865_ISGA	5770753	5770875	+	Bradyrhizobium japonicum
blr0867_ISGA	5773117	5773308	+	Bradyrhizobium japonicum
bll0868_ISGA	5783754	5783876	-	Bradyrhizobium japonicum
blr0869_ISGA	5787032	5787166	+	Bradyrhizobium japonicum
bll0870_ISGA	5788882	5789058	-	Bradyrhizobium japonicum
blr0871_ISGA	5796628	5796813	+	Bradyrhizobium japonicum
bll0876_ISGA	5804991	5805182	-	Bradyrhizobium japonicum
bll0882_ISGA	5871944	5872171	-	Bradyrhizobium japonicum
bll0883_ISGA	5872164	5872385	-	Bradyrhizobium japonicum
blr0884_ISGA	5885460	5885597	+	Bradyrhizobium japonicum
bll0886_ISGA	5901631	5901759	-	Bradyrhizobium japonicum
bll0887_ISGA	5901992	5902180	-	Bradyrhizobium japonicum
blr0892_ISGA	5964283	5964408	+	Bradyrhizobium japonicum
bll0893_ISGA	5987978	5988097	-	Bradyrhizobium japonicum
blr0895_ISGA	6006618	6006761	+	Bradyrhizobium japonicum
blr0897_ISGA	6009740	6009859	+	Bradyrhizobium japonicum
blr0904_ISGA	6045798	6046037	+	Bradyrhizobium japonicum
blr0907_ISGA	6067369	6067482	+	Bradyrhizobium japonicum
blr0908_ISGA	6067887	6068123	+	Bradyrhizobium japonicum
bll0910_ISGA	6068297	6068476	-	Bradyrhizobium
blr0917_ISGA	6087674	6087868	+	Bradyrhizobium japonicum
bll0921_ISGA	6126402	6126596	-	Bradyrhizobium japonicum
blr0925_ISGA	6146626	6146739	+	Bradyrhizobium japonicum
blr0937_ISGA	6255323	6255514	+	Bradyrhizobium japonicum
bll0938_ISGA	6258301	6258414	-	Bradyrhizobium japonicum
bll0943_ISGA	6326634	6326768	-	Bradyrhizobium japonicum
blr0944_ISGA	6327367	6327492	+	Bradyrhizobium japonicum
bll0946_ISGA	6328133	6328252	-	Bradyrhizobium japonicum
bll0950_ISGA	6331688	6331810	-	Alphaproteobacteria
bll0951_ISGA	6333321	6333548	-	Bradyrhizobium japonicum
bll0953_ISGA	6334708	6334833	-	Bradyrhizobium japonicum
blr0954_ISGA	6352623	6352760	+	Bradyrhizobium japonicum
bll0956_ISGA	6365868	6366086	-	Bradyrhizobium japonicum
bll0957_ISGA	6384904	6385020	-	Bradyrhizobium japonicum
blr0961_ISGA	6503939	6504055	+	Bradyrhizobium japonicum
bll0962_ISGA	6504298	6504441	-	Bradyrhizobium japonicum
blr0966_ISGA	6608624	6608758	+	Bradyrhizobium japonicum
blr0978_ISGA	6723499	6723621	+	Bradyrhizobium japonicum
bll0979_ISGA	6723696	6723863	-	Bradyrhizobium japonicum
bll0980_ISGA	6728265	6728459	-	Bradyrhizobium japonicum
blr0992_ISGA	6761984	6762124	+	Bradyrhizobium
blr0993_ISGA	6771488	6771616	+	Bradyrhizobium japonicum
blr0996_ISGA	6797124	6797270	+	Bradyrhizobium japonicum
blr1004_ISGA	6873972	6874088	+	Bradyrhizobium japonicum
bll1005_ISGA	6876196	6876345	-	Bradyrhizobium japonicum
bll1009_ISGA	6940414	6940563	-	Bradyrhizobium japonicum
blr1011_ISGA	6957326	6957547	+	Bradyrhizobium japonicum
bll1014_ISGA	6981964	6982092	-	Bradyrhizobium japonicum
blr1018_ISGA	6992559	6992705	+	Other
bll1019_ISGA	7030661	7030864	-	Bradyrhizobium japonicum
bll1020_ISGA	7033398	7033526	-	Bradyrhizobium japonicum
bll1021_ISGA	7069805	7069945	-	Bradyrhizobium japonicum
blr1022_ISGA	7080117	7080314	+	Bradyrhizobium japonicum
bll1025_ISGA	7089881	7090117	-	Bradyrhizobium japonicum
bll1028_ISGA	7107383	7107502	-	Bradyrhizobium japonicum
bll1029_ISGA	7107504	7107623	-	Bradyrhizobium japonicum
bll1034_ISGA	7121182	7121310	-	Bradyrhizobium japonicum
blr1035_ISGA	7127272	7127415	+	Bradyrhizobium japonicum
blr1036_ISGA	7158858	7159037	+	Bradyrhizobium japonicum
blr1038_ISGA	7180534	7180719	+	Bradyrhizobium japonicum
blr1039_ISGA	7181897	7182022	+	Bradyrhizobium japonicum
blr1040_ISGA	7184288	7184521	+	Bradyrhizobium japonicum
blr1041_ISGA	7187721	7187870	+	Bradyrhizobium
bll1042_ISGA	7202010	7202141	-	Bradyrhizobium japonicum
blr1044_ISGA	7203226	7203405	+	Bradyrhizobium japonicum
bll1045_ISGA	7203368	7203493	-	Bradyrhizobium japonicum
bll1064_ISGA	7376507	7376632	-	Bradyrhizobium japonicum
blr1075_ISGA	7497395	7497604	+	Bradyrhizobium japonicum
bll1079_ISGA	7515103	7515261	-	Bradyrhizobium japonicum
bll1080_ISGA	7538858	7538980	-	Bradyrhizobium japonicum
blr1081_ISGA	7540028	7540147	+	Bradyrhizobium japonicum
bll1085_ISGA	7584627	7584740	-	Bradyrhizobium japonicum
bll1088_ISGA	7619572	7619688	-	Bradyrhizobium japonicum
blr1089_ISGA	7619815	7619982	+	Bradyrhizobium japonicum
bll1090_ISGA	7644710	7644841	-	Bradyrhizobium japonicum
bll1092_ISGA	7667772	7667915	-	Bradyrhizobium japonicum
bll1094_ISGA	7675736	7675864	-	Bradyrhizobium japonicum
bll1095_ISGA	7683013	7683177	-	Bradyrhizobium japonicum
blr1096_ISGA	7685202	7685408	+	Other
bll1097_ISGA	7687661	7687792	-	Bradyrhizobium japonicum
bll1098_ISGA	7687825	7688022	-	Bradyrhizobium japonicum
bll1099_ISGA	7692311	7692439	-	Bradyrhizobium japonicum
bll1100_ISGA	7698754	7698882	-	Bradyrhizobium japonicum
blr1101_ISGA	7714905	7715114	+	Bradyrhizobium
bll1104_ISGA	7721338	7721457	-	Bradyrhizobium japonicum
blr1105_ISGA	7722776	7722979	+	Bradyrhizobium japonicum
bll1107_ISGA	7724300	7724485	-	Bradyrhizobium japonicum
bll1108_ISGA	7726404	7726580	-	Bradyrhizobium japonicum
bll1109_ISGA	7729370	7729552	-	Bradyrhizobium japonicum
blr1110_ISGA	7731333	7731476	+	Bradyrhizobium japonicum
blr1112_ISGA	7740739	7740945	+	Bradyrhizobium
blr1114_ISGA	7741119	7741337	+	Bradyrhizobium
blr1116_ISGA	7750538	7750657	+	Bradyrhizobium japonicum
bll1119_ISGA	7786389	7786526	-	Bradyrhizobium japonicum
bll1123_ISGA	7840145	7840315	-	Alphaproteobacteria
bll1127_ISGA	7879220	7879345	-	Bradyrhizobium japonicum
bll1128_ISGA	7882694	7882843	-	Bradyrhizobium japonicum
blr1130_ISGA	7886512	7886640	+	Bradyrhizobium japonicum
blr1132_ISGA	7893565	7893726	+	Bradyrhizobium japonicum
bll1134_ISGA	7935107	7935244	-	Bradyrhizobium japonicum
bll1135_ISGA	7936038	7936190	-	Bradyrhizobium japonicum
bll1136_ISGA	7936903	7937082	-	Other
bll1139_ISGA	7949250	7949369	-	Bradyrhizobium japonicum
blr1141_ISGA	7981478	7981648	+	Bradyrhizobium japonicum
blr1143_ISGA	7996007	7996195	+	Bradyrhizobium japonicum
bll1145_ISGA	8008612	8008734	-	Bradyrhizobium japonicum
blr1147_ISGA	8024110	8024334	+	Bradyrhizobium japonicum
blr1149_ISGA	8040544	8040660	+	Bradyrhizobium japonicum
blr1151_ISGA	8058008	8058205	+	Bradyrhizobium japonicum
blr1153_ISGA	8059889	8060101	+	Bradyrhizobium japonicum
bll1154_ISGA	8072963	8073142	-	Bradyrhizobium japonicum
bll1159_ISGA	8091296	8091415	-	Bradyrhizobium japonicum
blr1161_ISGA	8098798	8098983	+	Bradyrhizobium japonicum
blr1162_ISGA	8099005	8099145	+	Bradyrhizobium
bll1178_ISGA	8172636	8172749	-	Bradyrhizobium japonicum
bll1182_ISGA	8187338	8187520	-	Bradyrhizobium japonicum
blr1185_ISGA	8223940	8224071	+	Bradyrhizobium japonicum
blr1186_ISGA	8235636	8235752	+	Bradyrhizobium japonicum
bll1188_ISGA	8238251	8238382	-	Bradyrhizobium japonicum
blr1189_ISGA	8239084	8239317	+	Bradyrhizobium japonicum
blr1190_ISGA	8246512	8246646	+	Bradyrhizobium japonicum
blr1191_ISGA	8247052	8247237	+	Bradyrhizobium japonicum
bll1195_ISGA	8295737	8295967	-	Bradyrhizobium japonicum
bll1198_ISGA	8315132	8315284	-	Bradyrhizobium japonicum
bll1199_ISGA	8324179	8324322	-	Bradyrhizobium japonicum
blr1202_ISGA	8348067	8348237	+	Bradyrhizobium japonicum
bll1210_ISGA	8386218	8386385	-	Bradyrhizobium japonicum
blr1211_ISGA	8386441	8386620	+	Bradyrhizobium japonicum
bll1212_ISGA	8389018	8389242	-	Bradyrhizobium japonicum
bll1213_ISGA	8390398	8390520	-	Bradyrhizobium japonicum
bll1214_ISGA	8390526	8390759	-	Bradyrhizobium japonicum
bll1215_ISGA	8391264	8391464	-	Alphaproteobacteria
blr1217_ISGA	8392821	8392934	+	Bradyrhizobium japonicum
bll1218_ISGA	8397656	8397802	-	Bradyrhizobium japonicum
blr1219_ISGA	8398455	8398601	+	Bradyrhizobium japonicum
blr1220_ISGA	8401756	8401923	+	Bradyrhizobium japonicum
blr1221_ISGA	8402824	8403012	+	Bradyrhizobium japonicum
blr1222_ISGA	8405311	8405436	+	Bradyrhizobium japonicum
blr1223_ISGA	8405433	8405666	+	Bradyrhizobium japonicum
blr1224_ISGA	8407421	8407540	+	Bradyrhizobium japonicum
bll1225_ISGA	8411508	8411687	-	Bradyrhizobium japonicum
blr1226_ISGA	8424618	8424764	+	Bradyrhizobium japonicum
bll1227_ISGA	8428110	8428274	-	Bradyrhizobium japonicum
blr1228_ISGA	8428396	8428509	+	Bradyrhizobium japonicum
bll1229_ISGA	8430358	8430477	-	Bradyrhizobium japonicum
blr1230_ISGA	8430457	8430612	+	Other
blr1232_ISGA	8436252	8436377	+	Bradyrhizobium japonicum
bll1233_ISGA	8436674	8436829	-	Bradyrhizobium japonicum
blr1234_ISGA	8438209	8438346	+	Bradyrhizobium japonicum
blr1235_ISGA	8443721	8443885	+	Bradyrhizobium japonicum
bll1236_ISGA	8445073	8445195	-	Bradyrhizobium japonicum
bll1238_ISGA	8449146	8449304	-	Bradyrhizobium japonicum
blr1239_ISGA	8451881	8452036	+	Bradyrhizobium japonicum
bll1240_ISGA	8452330	8452500	-	Bradyrhizobium japonicum
blr1242_ISGA	8453920	8454054	+	Bradyrhizobium japonicum
blr1243_ISGA	8455818	8456036	+	Bradyrhizobium japonicum
bll1247_ISGA	8459811	8459936	-	Bradyrhizobium japonicum
bll1248_ISGA	8461932	8462153	-	Other
blr1249_ISGA	8465304	8465531	+	Bradyrhizobium japonicum
blr1250_ISGA	8465801	8466037	+	Bradyrhizobium japonicum
blr1252_ISGA	8467498	8467665	+	Bradyrhizobium japonicum
bll1260_ISGA	8542746	8542916	-	Bradyrhizobium japonicum
bll1263_ISGA	8564777	8564905	-	Bradyrhizobium japonicum
blr1266_ISGA	8609270	8609488	+	Alphaproteobacteria
bll1272_ISGA	8753978	8754121	-	Bradyrhizobium japonicum
blr1273_ISGA	8762559	8762687	+	Bradyrhizobium japonicum
bll1274_ISGA	8764561	8764701	-	Bradyrhizobium japonicum
bll1276_ISGA	8777314	8777484	-	Bradyrhizobium japonicum
blr1278_ISGA	8783950	8784072	+	Bradyrhizobium japonicum
bll1279_ISGA	8791078	8791230	-	Bradyrhizobium japonicum
bll1283_ISGA	8801328	8801492	-	Bradyrhizobium japonicum
blr1284_ISGA	8801639	8801797	+	Bradyrhizobium japonicum
bll1286_ISGA	8811791	8811910	-	Bradyrhizobium japonicum
bll1287_ISGA	8813226	8813357	-	Bradyrhizobium japonicum
bll1288_ISGA	8820689	8820901	-	Bradyrhizobium japonicum
blr1289_ISGA	8825030	8825230	+	Alphaproteobacteria
blr1290_ISGA	8825232	8825405	+	Alphaproteobacteria
blr1291_ISGA	8826078	8826215	+	Bradyrhizobium japonicum
blr1292_ISGA	8826262	8826417	+	Bradyrhizobium japonicum
bll1293_ISGA	8830259	8830498	-	Bradyrhizobium japonicum
bll1294_ISGA	8830579	8830707	-	Bradyrhizobium japonicum
blr1295_ISGA	8830695	8830871	+	Bradyrhizobium
bll1296_ISGA	8831336	8831452	-	Bradyrhizobium japonicum
blr1297_ISGA	8842414	8842533	+	Bradyrhizobium japonicum
blr1302_ISGA	8867734	8867919	+	Alphaproteobacteria
bll1303_ISGA	8879995	8880108	-	Bradyrhizobium japonicum
bll1304_ISGA	8882566	8882700	-	Bradyrhizobium japonicum
blr1305_ISGA	8887143	8887331	+	Bradyrhizobium japonicum
bll1307_ISGA	8954943	8955128	-	Bradyrhizobium japonicum
bll1311_ISGA	8981384	8981608	-	Other
bll1321_ISGA	9026557	9026700	-	Bradyrhizobium japonicum
bll1322_ISGA	9030397	9030513	-	Bradyrhizobium japonicum
bll1323_ISGA	9030540	9030761	-	Bradyrhizobium japonicum
blr1325_ISGA	9038208	9038447	+	Bradyrhizobium japonicum
blr1327_ISGA	9038983	9039120	+	Bradyrhizobium japonicum
blr1328_ISGA	9041533	9041760	+	Bradyrhizobium japonicum
blr1330_ISGA	9044841	9044960	+	Bradyrhizobium japonicum
bll1332_ISGA	9049774	9049992	-	Bradyrhizobium japonicum
bll1333_ISGA	9049955	9050125	-	Bradyrhizobium japonicum
bll1334_ISGA	9050227	9050385	-	Bradyrhizobium japonicum
bll1335_ISGA	9052778	9052903	-	Alphaproteobacteria
bll1336_ISGA	9053644	9053775	-	Bradyrhizobium japonicum
bll1337_ISGA	9054741	9054854	-	Bradyrhizobium
bll1338_ISGA	9055012	9055131	-	Bradyrhizobium japonicum
bll1339_ISGA	9056949	9057083	-	Bradyrhizobium japonicum
blr1340_ISGA	9067687	9067809	+	Bradyrhizobium japonicum
blr1343_ISGA	9095834	9095953	+	Alphaproteobacteria
bll1344_ISGA	9098736	9098876	-	Bradyrhizobium japonicum
bll1346_ISGA	9105167	9105337	-	Bradyrhizobium japonicum
blr0163_ISGA	1362053	1362166	+	Bradyrhizobium japonicum
blr0214_ISGA	1735104	1735268	+	Other
bll0241_ISGA	1815022	1815168	-	Alphaproteobacteria
blr0276_ISGA	1976196	1976333	+	Other
bll0311_ISGA	2069333	2069470	-	Other
blr0317_ISGA	2102485	2102688	+	Bradyrhizobium japonicum
blr0327_ISGA	2126116	2126286	+	Other
bll0328_ISGA	2126823	2126966	-	Bradyrhizobium japonicum
bll0334_ISGA	2154023	2154151	-	Bradyrhizobium japonicum
bll0361_ISGA	2291131	2291250	-	Other
blr0615_ISGA	4436996	4437208	+	Alphaproteobacteria
bll0712_ISGA	4962465	4962641	-	Other
bll0812_ISGA	5476326	5476445	-	-
bll0958_ISGA	6400092	6400211	-	Bradyrhizobium
blr1024_ISGA	7089601	7089729	+	Other
bll1152_ISGA	8058418	8058561	-	Other
bll1316_ISGA	9008211	9008369	-	Other
blr1317_ISGA	9009205	9009342	+	Other
bll1319_ISGA	9011824	9012036	-	Other
bll1345_ISGA	9101239	9101433	-	Other
