# Supplementary material for: Small Open Reading Frames, Non-Coding RNAs and Repetitive Elements in Bradyrhizobium japonicum USDA 110
Source: PLoS One. 2016 Oct 27;11(10):e0165429. doi: 10.1371/journal.pone.0165429 (PMC5082802; doi:10.1371/journal.pone.0165429)
Supplement: S7 Table — (XLSX) [file pone.0165429.s024.xlsx]

## Sheet: BLASTN
S7 Table. Conservation of 20 sORFs with homologs outside Alphaproteobacteria, which were found by BLASTN.
Locus Tag	Start	End	Strand	In other	In Alphaproteobacteria
bll0334_ISGA	2154023	2154151	-	less 10	less 10
bll0361_ISGA	2291131	2291250	-	less 10	less 10
blr0615_ISGA	4436996	4437208	+	less 10	less 10
blr0327_ISGA	2126116	2126286	+	less 10	less 10
blr1024_ISGA	7089601	7089729	+	less 10	less 10
blr0163_ISGA	1362053	1362166	+	less 10	less 10
blr0317_ISGA	2102485	2102688	+	less 10	less 10
bll1345_ISGA	9101239	9101433	-	less 10	less 10
bll0812_ISGA	5476326	5476445	-	less 10	less 10
bll1152_ISGA	8058418	8058561	-	less 10	less 10
bll1316_ISGA	9008211	9008369	-	less 10	less 10
bll0712_ISGA	4962465	4962641	-	less 10	less 10
blr0276_ISGA	1976196	1976333	+	less 10	more 10
blr0214_ISGA	1735104	1735268	+	less 10	more 10
bll0958_ISGA	6400092	6400211	-	less 10	more 10
bll0328_ISGA	2126823	2126966	-	less 10	more 10
bll0241_ISGA	1815022	1815168	-	more 10	less 10
blr1317_ISGA	9009205	9009342	+	more 10	less 10
bll0311_ISGA	2069333	2069470	-	more 10	less 10
bll1319_ISGA	9011824	9012036	-	more 10	more 10
