# Supplementary material for: Small Open Reading Frames, Non-Coding RNAs and Repetitive Elements in Bradyrhizobium japonicum USDA 110
Source: PLoS One. 2016 Oct 27;11(10):e0165429. doi: 10.1371/journal.pone.0165429 (PMC5082802; doi:10.1371/journal.pone.0165429)
Supplement: S11 Table — (XLSX) [file pone.0165429.s028.xlsx]

## Sheet: Tabelle1
S11 Table. List of organisms with blr0250_ISGA homologs.
Candidatus Chloracidobacterium thermophilum B	Acidobacteria
Actinosynnema mirum DSM 43827	Actinobacteria
Rubrobacter radiotolerans strain RSPS-4	Actinobacteria
Rubrobacter xylanophilus DSM 9941	Actinobacteria
Saccharothrix espanaensis DSM 44229	Actinobacteria
Bradyrhizobium japonicum SEMIA 5079 genome	Alphaproteobacteria
Bradyrhizobium japonicum USDA 110	Alphaproteobacteria
Bradyrhizobium japonicum USDA 6	Alphaproteobacteria
Bradyrhizobium sp. ORS278	Alphaproteobacteria
Nitrobacter hamburgensis X14	Alphaproteobacteria
Nitrobacter winogradskyi Nb-255	Alphaproteobacteria
Tistrella mobilis KA081020-065	Alphaproteobacteria
Caldisphaera lagunensis DSM 15908	Archaea
Candidatus Nitrosopumilus sp. AR2	Archaea
Methanococcoides burtonii DSM 6242	Archaea
Methanococcus maripaludis X1	Archaea
Methanosaeta thermophila PT	Archaea
Pyrococcus sp. ST04	Archaea
Staphylothermus hellenicus DSM 12710	Archaea
Cytophaga hutchinsonii ATCC 33406	Bacteroidetes
Hymenobacter swuensis DY53	Bacteroidetes
Salinibacter ruber DSM 13855	Bacteroidetes
Salinibacter ruber M8	Bacteroidetes
Salinibacter ruber M8 plasmid pSR84	Bacteroidetes
Neisseria meningitidis alpha710	Betaproteobacteria
Neisseria meningitidis M01-240149	Betaproteobacteria
Neisseria meningitidis NZ-05/33	Betaproteobacteria
Thauera sp. MZ1T	Betaproteobacteria
Prosthecochloris aestuarii DSM 271	Chlorobi
Herpetosiphon aurantiacus DSM 785	Chloroflexi
Acaryochloris marina MBIC11017	Cyanobacteria
Chamaesiphon minutus PCC 6605	Cyanobacteria
Chlorobium phaeobacteroides BS1	Cyanobacteria
Chlorobium tepidum TLS	Cyanobacteria
Cyanobacterium stanieri PCC 7202	Cyanobacteria
Gloeobacter kilaueensis JS1	Cyanobacteria
Gloeobacter violaceus PCC 7421	Cyanobacteria
Corallococcus coralloides DSM 2259	Deltaproteobacteria
Desulfatibacillum alkenivorans AK-01	Deltaproteobacteria
Desulfobacca acetoxidans DSM 11109	Deltaproteobacteria
Desulfococcus oleovorans Hxd3	Deltaproteobacteria
Lawsonia intracellularis N343 plasmid 3	Deltaproteobacteria
Lawsonia intracellularis PHE/MN1-00 plasmid 3	Deltaproteobacteria
Myxococcus fulvus HW-1	Deltaproteobacteria
Myxococcus stipitatus DSM 14675	Deltaproteobacteria
Myxococcus xanthus DK 1622	Deltaproteobacteria
Bacillus clausii KSM-K16	Firmicutes
Clostridium beijerinckii NCIMB 8052	Firmicutes
Clostridium botulinum B str. Eklund 17B(NRP)	Firmicutes
Clostridium botulinum E3 str. Alaska E43	Firmicutes
Clostridium saccharoperbutylacetonicum N1-4(HMT)	Firmicutes
Desulfitobacterium hafniense DCB-2	Firmicutes
Desulfotomaculum acetoxidans DSM 771	Firmicutes
Ethanoligenens harbinense YUAN-3	Firmicutes
Geobacillus sp. GHH01	Firmicutes
Geobacillus stearothermophilus ATCC 12980	Firmicutes
Geobacillus stearothermophilus L32-65	Firmicutes
Paenibacillus alvei strain CCM 2051	Firmicutes
Paenibacillus larvae subsp. larvae DSM 25430	Firmicutes
Paenibacillus mucilaginosus 3016	Firmicutes
Paenibacillus mucilaginosus K02 clone nnu-pd49	Firmicutes
Selenomonas ruminantium subsp. lactilytica TAM6421	Firmicutes
Selenomonas sputigena ATCC 35185	Firmicutes
Thermobacillus composti KWC4	Firmicutes
Batrachochytrium dendrobatidis JAM81	Fungi
Aeromonas hydrophila PPD134/91	Gammaproteobacteria
Aeromonas hydrophila strain AH-3 serotype 034	Gammaproteobacteria
Aeromonas hydrophila YL17	Gammaproteobacteria
Aliivibrio salmonicida LFI1238	Gammaproteobacteria
Desulfovibrio africanus str. Walvis Bay	Gammaproteobacteria
Desulfovibrio desulfuricans subsp. desulfuricans str. ATCC 27774	Gammaproteobacteria
Desulfovibrio gigas DSM 1382 = ATCC 19364	Gammaproteobacteria
Desulfovibrio hydrothermalis str. sp nov AM13	Gammaproteobacteria
Desulfovibrio magneticus RS-1	Gammaproteobacteria
Desulfovibrio salexigens DSM 2638	Gammaproteobacteria
Dickeya dadantii 3937	Gammaproteobacteria
Dickeya zeae Ech1591	Gammaproteobacteria
Dyella jiangningensis strain SBZ 3-12	Gammaproteobacteria
Enterobacter asburiae L1	Gammaproteobacteria
Enterobacter cloacae P101	Gammaproteobacteria
Enterobacter sp. 638	Gammaproteobacteria
Erwinia carotovora subsp. atroseptica SCRI1043	Gammaproteobacteria
Escherichia coli O45	Gammaproteobacteria
Escherichia coli S88 chromosome	Gammaproteobacteria
Escherichia coli serogroup O66	Gammaproteobacteria
Escherichia coli serovar O109	Gammaproteobacteria
Escherichia coli strain 015-1269	Gammaproteobacteria
Escherichia coli strain 06-224	Gammaproteobacteria
Escherichia coli strain 11C	Gammaproteobacteria
Escherichia coli strain 87.1085	Gammaproteobacteria
Escherichia coli strain 89.0609	Gammaproteobacteria
Escherichia coli strain A9619-C2	Gammaproteobacteria
Escherichia coli strain ALLG	Gammaproteobacteria
Escherichia coli strain COU	Gammaproteobacteria
Escherichia coli strain G4	Gammaproteobacteria
Escherichia coli strain H3	Gammaproteobacteria
Escherichia coli strain H61	Gammaproteobacteria
Escherichia coli strain WDG-3	Gammaproteobacteria
Hahella chejuensis KCTC 2396	Gammaproteobacteria
Halothiobacillus neapolitanus c2	Gammaproteobacteria
Pantoea ananatis AJ13355	Gammaproteobacteria
Pantoea ananatis LMG 20103	Gammaproteobacteria
Pectobacterium atrosepticum strain JG10-08	Gammaproteobacteria
Pectobacterium sp. SCC3193	Gammaproteobacteria
Pectobacterium wasabiae WPP163	Gammaproteobacteria
Proteus mirabilis BB2000	Gammaproteobacteria
Providencia alcalifaciens serogroup O36	Gammaproteobacteria
Pseudomonas entomophila str. L48	Gammaproteobacteria
Pseudomonas monteilii SB3078	Gammaproteobacteria
Pseudomonas monteilii SB3101	Gammaproteobacteria
Pseudomonas putida BIRD-1	Gammaproteobacteria
Pseudomonas putida DOT-T1E	Gammaproteobacteria
Pseudomonas putida F1	Gammaproteobacteria
Pseudomonas putida GB-1	Gammaproteobacteria
Pseudomonas putida HB3267	Gammaproteobacteria
Pseudomonas putida KT2440	Gammaproteobacteria
Pseudomonas putida NBRC 14164	Gammaproteobacteria
Pseudomonas putida ND6	Gammaproteobacteria
Pseudomonas putida S16	Gammaproteobacteria
Pseudomonas putida strain DLL-E4	Gammaproteobacteria
Pseudomonas putida W619	Gammaproteobacteria
Pseudomonas sp. FGI182	Gammaproteobacteria
Pseudomonas sp. UW4	Gammaproteobacteria
Pseudoxanthomonas spadix BD-a59	Gammaproteobacteria
Pseudoxanthomonas suwonensis 11-1	Gammaproteobacteria
Rahnella aquatilis HX2	Gammaproteobacteria
Rhodanobacter sp. 2APBS1	Gammaproteobacteria
Serratia marcescens	Gammaproteobacteria
Serratia marcescens FGI94	Gammaproteobacteria
Serratia plymuthica 4Rx13	Gammaproteobacteria
Serratia plymuthica AS9	Gammaproteobacteria
Serratia plymuthica S13	Gammaproteobacteria
Serratia sp. AS12	Gammaproteobacteria
Serratia sp. AS13	Gammaproteobacteria
Shewanella baltica BA175	Gammaproteobacteria
Shewanella baltica OS185	Gammaproteobacteria
Shewanella putrefaciens 200	Gammaproteobacteria
Shewanella putrefaciens CN-32	Gammaproteobacteria
Shigella boydii type 2	Gammaproteobacteria
Stenotrophomonas maltophilia D457	Gammaproteobacteria
Stenotrophomonas maltophilia JV3	Gammaproteobacteria
Stenotrophomonas maltophilia K279a, strain K279a	Gammaproteobacteria
Stenotrophomonas maltophilia R551-3	Gammaproteobacteria
Stenotrophomonas rhizophila strain DSM14405	Gammaproteobacteria
Thioalkalivibrio nitratireducens DSM 14787	Gammaproteobacteria
Thioalkalivibrio sulfidophilus HL-EbGr7	Gammaproteobacteria
Thioalkalivibrio thiocyanoxidans ARh 4	Gammaproteobacteria
Vibrio cholerae isolate S6535	Gammaproteobacteria
Vibrio fischeri ES114	Gammaproteobacteria
Xanthomonas albilineans GPE PC73	Gammaproteobacteria
Xanthomonas axonopodis pv. citri str. 306	Gammaproteobacteria
Xanthomonas axonopodis pv. citrumelo F1	Gammaproteobacteria
Xanthomonas axonopodis Xac29-1	Gammaproteobacteria
Xanthomonas campestris pv. campestris complete genome, strain B100	Gammaproteobacteria
Xanthomonas campestris pv. campestris str. 8004	Gammaproteobacteria
Xanthomonas campestris pv. campestris str. ATCC 33913	Gammaproteobacteria
Xanthomonas campestris pv. raphani 756C	Gammaproteobacteria
Xanthomonas campestris pv. Vesicatoria	Gammaproteobacteria
Xanthomonas citri subsp. citri Aw12879	Gammaproteobacteria
Xanthomonas fuscans subsp. fuscans str. 4834-R	Gammaproteobacteria
Xanthomonas oryzae pv. oryzae KACC 10331	Gammaproteobacteria
Xanthomonas oryzae pv. oryzae MAFF 311018	Gammaproteobacteria
Xanthomonas oryzae pv. oryzae PXO99A	Gammaproteobacteria
Xanthomonas oryzae pv. oryzicola BLS256	Gammaproteobacteria
Xylella fastidiosa 9a5c	Gammaproteobacteria
Xylella fastidiosa M12	Gammaproteobacteria
Xylella fastidiosa MUL0034	Gammaproteobacteria
Xylella fastidiosa subsp. fastidiosa GB514/ylella fastidiosa Temecula1	Gammaproteobacteria
Xylella fastidiosa subsp. pauca strain COF0238	Gammaproteobacteria
Xylella fastidiosa subsp. pauca strain COF0239	Gammaproteobacteria
Xylella fastidiosa subsp. pauca strain CVC0145	Gammaproteobacteria
Xylella fastidiosa subsp. pauca strain CVC0251	Gammaproteobacteria
Xylella fastidiosa subsp. sandyi Ann-1	Gammaproteobacteria
Ignavibacterium album JCM 16511	Ignavibacteriae
Candidatus Nitrospira defluvii	Nitrospirae
Leptospirillum ferriphilum ML-04	Nitrospirae
Leptospirillum ferriphilum YSK	Nitrospirae
Leptospirillum ferrooxidans C2-3	Nitrospirae
Kuenenia stuttgartiensis	Planctomycetes
Singulisphaera acidiphila DSM 18658	Planctomycetes
Spirochaeta smaragdinae DSM 11293	Spirochaetes
Treponema caldaria DSM 7334	Spirochaetes
Thermanaerovibrio acidaminovorans DSM 6589	Synergistetes
Thermotoga neapolitana DSM 4359	Thermotogae
Thermotoga sp. RQ2	Thermotogae
Opitutus terrae PB90-1	Verrucomicrobia
