# Supplementary material for: Small Open Reading Frames, Non-Coding RNAs and Repetitive Elements in Bradyrhizobium japonicum USDA 110
Source: PLOS journal article supplement (doi:10.1371/journal.pone.0165429), 2016-10-27
Supplement: S14 (10.1371/journal.pone.0165429.s014) [file journal.pone.0165429.s014]

[illegible]

jap., *Bradyrhizobium japonicum*; B. sp., *Bradyrhizobium* sp.
